# Supplementary material
Source: PubMed Central journal article supplement (PMC5989638)
Supplement: mmc1.pdf [file mmc1.pdf]

# Community-Acquired Pneumonia Visualized on CT Scans but Not Chest Radiographs

## Pathogens, Severity, and Clinical Outcomes

*Cameron P. Upchurch, MD; Carlos G. Grijalva, MD, MPH; Richard G. Wunderink, MD, FCCP; Derek J. Williams, MD, MPH; Grant W. Waterer, MBBS, PhD; Evan J. Anderson, MD; Yuwei Zhu, MD; Eric M. Hart, MD; Frank Carroll, MD; Anna M. Bramley, MPH; Seema Jain, MD; Kathryn M. Edwards, MD; and Wesley H. Self, MD, MPH*

CHEST 2018; 153(3):601-610

*Online supplements are not copyedited prior to posting and the author(s) take full responsibility for the accuracy of all data.*

© 2017 AMERICAN COLLEGE OF CHEST PHYSICIANS. Reproduction of this article is prohibited without written permission from the American College of Chest Physicians. See online for more details. DOI: 10.1016/j.chest.2017.07.035

**e-Table 1.** Clinical characteristics of patients who underwent computed tomography (CT) and those who did not undergo CT. All included patients underwent chest x-ray (CXR).

|                                                        | <b>CT Completed<br/>(n=748)</b> | <b>CT not<br/>Completed<br/>(n=1503)</b> | <b>p</b> |
|--------------------------------------------------------|---------------------------------|------------------------------------------|----------|
| <i>Demographics</i>                                    |                                 |                                          |          |
| Age [years], median (IQR)                              | 56 (46, 67)                     | 59 (47, 73)                              | < 0.01   |
| Female, n (%)                                          | 353 (53.0)                      | 797 (47.2)                               | < 0.01   |
| <i>Vital signs, median (IQR)</i>                       |                                 |                                          |          |
| Heart Rate [beats/min]                                 | 101 (88, 114)                   | 99 (86, 114)                             | 0.11     |
| Systolic blood pressure [mm Hg]                        | 131 (116, 149)                  | 132 (114, 149)                           | 0.96     |
| Respiratory rate [breaths/min]                         | 20 (18, 22)                     | 20 (18, 24)                              | 0.74     |
| Temperature [°F]                                       | 98.4 (97.3, 99.7)               | 98.6 (97.1, 100.3)                       | 0.05     |
| Oxygen saturation [%]                                  | 95 (93, 98)                     | 95 (92, 97)                              | 0.51     |
| <i>Signs and Symptoms, n (%)</i>                       |                                 |                                          |          |
| Cough with sputum production                           | 348 (46.5)                      | 658 (43.4)                               | 0.22     |
| Hemoptysis                                             | 91 (12.2)                       | 106 (7.1)                                | <0.01    |
| Shortness of breath                                    | 612 (81.8)                      | 1140 (75.9)                              | <0.01    |
| Chest pain                                             | 428 (57.2)                      | 681 (45.3)                               | <0.01    |
| Confusion                                              | 117 (15.6)                      | 332 (22.1)                               | <0.01    |
| Wheezing                                               | 317 (42.4)                      | 657 (43.7)                               | 0.55     |
| <i>Comorbidities, n (%)</i>                            |                                 |                                          |          |
| Asthma                                                 | 181 (24.2)                      | 401 (26.7)                               | 0.21     |
| Chronic Obstructive Pulmonary Disease                  | 163 (21.8)                      | 356 (23.7)                               | 0.31     |
| Chronic Heart Failure                                  | 115 (15.4)                      | 315 (21.0)                               | <0.01    |
| Diabetes mellitus                                      | 166 (22.2)                      | 418 (27.8)                               | <0.01    |
| Chronic kidney disease                                 | 94 (12.6)                       | 259 (17.2)                               | <0.01    |
| Chronic liver disease                                  | 43 (5.8)                        | 82 (5.5)                                 | 0.78     |
| Obesity (Body Mass Index $\geq 30$ kg/m <sup>2</sup> ) | 270 (36.1)                      | 551 (36.7)                               | 0.79     |
| <i>Laboratory values, median (IQR)</i>                 |                                 |                                          |          |
| White blood cell count [thous cells/ mL]               | 11.2 (7.7, 14.7)                | 11.5 (8.2, 15.0)                         | 0.06     |
| Blood urea nitrogen [mg/dL]                            | 14 (10, 20)                     | 16 (10, 25)                              | <0.01    |
| Blood glucose [mg/dL]                                  | 114 (98, 139)                   | 116 (99, 148)                            | 0.10     |
| Procalcitonin [ng/ml] *                                | 0.13 (<0.05, 0.64)              | 0.16 (<0.05, 1.01)                       | 0.01     |
| <i>Pneumonia Severity Index risk class, n (%)</i>      |                                 |                                          |          |
| I-II (low risk)                                        | 366 (48.9)                      | 654 (43.5)                               | 0.02     |
| III (moderate risk)                                    | 150 (20.1)                      | 300 (20.0)                               |          |
| IV-V (high risk)                                       | 232 (31.0)                      | 549 (36.5)                               |          |
| <i>CURB-65 score, n (%)</i>                            |                                 |                                          |          |
| 0-1 (low risk)                                         | 579 (77.4)                      | 991 (65.9)                               | < 0.01   |
| 2 (moderate risk)                                      | 121 (16.2)                      | 308 (20.5)                               |          |
| 3-5 (high risk)                                        | 48 (6.4)                        | 204 (13.6)                               |          |
| <i>ATS severe pneumonia criteria, n (%)</i>            |                                 |                                          |          |
| < 3 criteria (non-severe)                              | 711 (95.1)                      | 1380 (91.8)                              | 0.01     |
| $\geq 3$ criteria (severe)                             | 37 (4.9)                        | 123 (8.2)                                |          |

\* 520 patients did not have procalcitonin measured, including 162 (21.7%) with CT completed and 358 (23.9%) with CT not completed.

Abbreviations: CT computed tomography; CXR chest x-ray; n number; IQR interquartile range; min minute; mm millimeter; Hg mercury; F Fahrenheit; mL microliter; mg milligram; dL deciliter; ng nanogram; ml milliliter; CURB-65 confusion, uremia, respiratory rate, blood pressure, age  $\geq 65$  years; ATS American Thoracic Society.

**e-Table 2.** Pathogens detected among patients who underwent computed tomography (CT) and those who did not undergo CT.

| <b>Pathogens Detected, n (%)</b>  | <b>CT completed (n=748)</b> | <b>CT not Completed (n=1503)</b> |
|-----------------------------------|-----------------------------|----------------------------------|
| Any pathogen                      | 256 (34.2)                  | 593 (39.5)                       |
| Co-detection of $\geq 1$ pathogen | 31 (4.1)                    | 79 (5.3)                         |
| Any Bacteria                      | 89 (11.9)                   | 216 (14.4)                       |
| <i>Streptococcus pneumoniae</i>   | 32 (4.3)                    | 82 (5.5)                         |
| Group A Streptococcus             | 4 (0.5)                     | 3 (0.2)                          |
| Viridans group Streptococci       | 7 (0.9)                     | 1 (0.1)                          |
| Other Streptococci species        | 4 (0.5)                     | 4 (0.3)                          |
| <i>Staphylococcus aureus</i>      | 10 (1.3)                    | 27 (1.8)                         |
| <i>Haemophilus influenzae</i>     | 5 (0.7)                     | 8 (0.5)                          |
| <i>Escherichia coli</i>           | 7 (0.9)                     | 10 (0.7)                         |
| <i>Pseudomonas aeruginosa</i>     | 2 (0.3)                     | 6 (0.4)                          |
| <i>Klebsiella pneumoniae</i>      | 6 (0.8)                     | 6 (0.4)                          |
| <i>Mycoplasma pneumoniae</i>      | 6 (0.8)                     | 37 (2.5)                         |
| <i>Chlamydia pneumoniae</i>       | 2 (0.3)                     | 7 (0.5)                          |
| <i>Legionella pneumophila</i>     | 7 (0.9)                     | 25 (1.7)                         |
| Other bacteria                    | 5 (0.7)                     | 0 (0)                            |
| Any Virus                         | 167 (22.3)                  | 423 (28.1)                       |
| Influenza                         | 36 (4.8)                    | 94 (6.3)                         |
| Parainfluenza virus               | 21 (2.8)                    | 46 (3.1)                         |
| Coronavirus                       | 17 (2.3)                    | 36 (2.4)                         |
| Human metapneumovirus             | 25 (3.3)                    | 63 (4.2)                         |
| Respiratory syncytial virus       | 17 (2.3)                    | 51 (3.4)                         |
| Human rhinovirus                  | 53 (7.1)                    | 140 (9.3)                        |
| Adenovirus                        | 9 (1.2)                     | 23 (1.5)                         |

Abbreviations: n number; CT computed tomography; CXR chest x-ray

**e-Table 3.** Clinical outcomes among patients who underwent computed tomography (CT) and those who did not undergo CT.

| <b>Clinical Outcome</b>                                      | <b>CT-completed<br/>(n=748)</b> | <b>CT not Completed<br/>(n=1503)</b> |
|--------------------------------------------------------------|---------------------------------|--------------------------------------|
| In-hospital death, n (%)                                     | 16 (2.1)                        | 33 (2.2)                             |
| Hospital length-of-stay (days) among survivors, median (IQR) | 4 (2-7)                         | 3 (2-5)                              |
| ICU admission, n (%)                                         | 166 (22)                        | 316 (21)                             |
| Invasive mechanical ventilation, n (%)                       | 45 (0.6)                        | 72 (4.8)                             |
| Vasopressor-dependent septic shock, n (%)                    | 35 (4.7)                        | 52 (3.5)                             |
| Moderate-severe ARDS, n (%)                                  | 24 (3.2)                        | 66 (4.4)                             |

**e-Table 4.** Clinical characteristics at hospital presentation, with the CXR pneumonia group subclassified based on CT results: CXR pneumonia / CT not done (CXR+/CT not done); CXR pneumonia / CT pneumonia (CXR+/CT+); CXR pneumonia / CT no pneumonia (CXR+/CT-).

|                                                        | CXR pneumonia             |                    |                      | CT-only pneumonia (CXR-/CT+) (n=66) |
|--------------------------------------------------------|---------------------------|--------------------|----------------------|-------------------------------------|
|                                                        | CXR+/CT not done (n=1503) | CXR+/CT+ (n=652)   | CXR+/CT- (n=30)      |                                     |
| <i>Demographics</i>                                    |                           |                    |                      |                                     |
| Age [years], median (IQR)                              | 59 (47-73)                | 56 (47-67)         | 63.5 (55-73)         | 53 (40-63)                          |
| Female, n (%)                                          | 797 (53)                  | 299 (45.9)         | 15 (50)              | 39 (59.1)                           |
| <i>Vital signs, median (IQR)</i>                       |                           |                    |                      |                                     |
| Heart Rate [beats/min]                                 | 99 (86-114)               | 101 (88-114)       | 103 (78-123)         | 100 (88-118)                        |
| Systolic blood pressure [mm Hg]                        | 132 (114-139)             | 130 (115-147)      | 133 (124-149)        | 140 (126-157)                       |
| Respiratory rate [breaths/min]                         | 20 (18-24)                | 20 (18-22)         | 20 (18-22)           | 20 (18-24)                          |
| Temperature [°F]                                       | 98.6 (97.1-100.3)         | 98.4 (97.3-99.7)   | 97.7 (96.3-99.2)     | 98.4 (97.3-100.3)                   |
| Oxygen saturation [%]                                  | 95 (92-97)                | 95 (93-98)         | 95 (93-98)           | 96 (94-98)                          |
| <i>Signs and Symptoms, n (%)</i>                       |                           |                    |                      |                                     |
| Cough with sputum production                           | 845 (56.2)                | 344 (52.8)         | 17 (56.7)            | 39 (59.1)                           |
| Hemoptysis                                             | 106 (7.1)                 | 84 (12.9)          | 2 (6.7)              | 5 (7.6)                             |
| Shortness of breath                                    | 1140 (75.9)               | 537 (82.4)         | 26 (86.7)            | 49 (74.2)                           |
| Chest pain                                             | 681 (45.3)                | 365 (55.8)         | 20 (66.7)            | 44 (66.7)                           |
| Confusion                                              | 332 (22.1)                | 99 (15.2)          | 7 (23.3)             | 11 (16.7)                           |
| Wheezing                                               | 657 (43.7)                | 260 (39.9)         | 20 (66.7)            | 37 (56.1)                           |
| <i>Comorbidities, n (%)</i>                            |                           |                    |                      |                                     |
| Asthma                                                 | 401 (26.7)                | 149 (22.9)         | 11 (36.7)            | 21 (31.8)                           |
| Chronic Obstructive Pulmonary Disease                  | 356 (23.7)                | 135 (20.7)         | 14 (46.7)            | 14 (21.2)                           |
| Chronic Heart Failure                                  | 315 (21)                  | 100 (15.3)         | 7 (23.3)             | 8 (12.1)                            |
| Diabetes mellitus                                      | 418 (27.8)                | 137 (21)           | 8 (26.7)             | 21 (31.9)                           |
| Chronic kidney disease                                 | 259 (17.2)                | 81 (12.4)          | 4 (13.3)             | 9 (13.6)                            |
| Chronic liver disease                                  | 82 (5.5)                  | 37 (5.7)           | 3 (10)               | 3 (4.6)                             |
| Obesity (Body Mass Index $\geq 30$ kg/m <sup>2</sup> ) | 551 (36.7)                | 228 (35)           | 10 (33.3)            | 32 (48.5)                           |
| <i>Laboratory values, median (IQR)</i>                 |                           |                    |                      |                                     |
| White blood cell count [thous cells/ mL]               | 11.5 (8.2-15)             | 11.3 (7.9-14.8)    | 8.9 (5.5-11.9)       | 11.1 (6.9-14.2)                     |
| Blood urea nitrogen [mg/dL]                            | 16 (10-25)                | 14 (10-20)         | 14 (12-17)           | 12 (9-19)                           |
| Blood glucose [mg/dL]                                  | 116 (99-148)              | 113.5 (98-139)     | 114 (102-136)        | 120 (102-144)                       |
| Procalcitonin [ng/ml] *                                | 0.16 (<0.05 - 1.01)       | 0.15 (<0.05- 0.64) | <0.05 (<0.05- <0.05) | <0.05 (<0.05- 0.11)                 |

| <i>Pneumonia Severity</i>                   |             |            |           |           |
|---------------------------------------------|-------------|------------|-----------|-----------|
| <i>Index risk class, n (%)</i>              |             |            |           |           |
| I-II (low risk)                             | 654 (43.5)  | 316 (48.5) | 9 (30)    | 41 (62.1) |
| III (moderate risk)                         | 300 (20)    | 131 (20.1) | 8 (26.7)  | 11 (16.7) |
| IV-V (high risk)                            | 549 (36.5)  | 205 (31.4) | 13 (43.3) | 14 (21.2) |
| <i>Index score, median (IQR)</i>            |             |            |           |           |
| <i>CURB-65 score, n (%)</i>                 |             |            |           |           |
| 0-1 (low risk)                              | 991 (65.9)  | 503 (77.2) | 23 (76.7) | 53 (80.3) |
| 2 (moderate risk)                           | 308 (20.5)  | 109 (16.7) | 5 (16.7)  | 7 (10.6)  |
| 3-5 (high risk)                             | 204 (13.6)  | 40 (6.1)   | 2 (6.7)   | 6 (9.1)   |
| <i>ATS severe pneumonia criteria, n (%)</i> |             |            |           |           |
| < 3 criteria (non-severe)                   | 1387 (92.3) | 619 (94.9) | 30 (100)  | 63 (95.5) |
| ≥ 3 criteria (severe)                       | 116 (7.7)   | 33 (5.1)   | 0 (0)     | 3 (4.5)   |
| <i>Antibiotics within six hours</i>         | 1284 (85.4) | 501 (76.8) | 26 (86.7) | 39 (59.1) |

Abbreviations: CT computed tomography; CXR chest x-ray; n number; IQR interquartile range; min minute; mm millimeter; Hg mercury; F Fahrenheit; mL microliter; mg milligram; dL deciliter; ng nanogram; ml milliliter; CURB-65 confusion, uremia, respiratory rate, blood pressure, age ≥ 65 years; ATS American Thoracic Society.

**e-Table 5.** Pathogens detected, with the CXR pneumonia group sub-classified based on CT results: CXR pneumonia / CT not done (CXR+/CT not done); CXR pneumonia / CT pneumonia (CXR+/CT+); CXR pneumonia / CT no pneumonia (CXR+/CT-).

| Pathogens Detected,<br>n (%)                  | CXR pneumonia                   |                     |                    | CT-only<br>pneumonia<br>(CXR-/CT+)<br>(n=66) |
|-----------------------------------------------|---------------------------------|---------------------|--------------------|----------------------------------------------|
|                                               | CXR+/CT<br>not done<br>(n=1503) | CXR+/CT+<br>(n=652) | CXR+/CT-<br>(n=30) |                                              |
| Any pathogen                                  | 593 (39.5)                      | 225 (34.5)          | 4 (13.3)           | 27 (40.9)                                    |
| Co-detection of ≥ 1<br>pathogen               | 79 (5.3)                        | 29 (4.5)            | 0 (0)              | 2 (3.0)                                      |
| Any Bacteria                                  | 216 (14.4)                      | 80 (12.3)           | 1 (3.3)            | 8 (12.1)                                     |
| <i>Streptococcus pneumoniae</i>               | 82 (5.5)                        | 29 (4.5)            | 0 (0)              | 3 (4.6)                                      |
| Group A                                       | 3 (0.2)                         | 4 (0.6)             | 0 (0)              | 0 (0)                                        |
| Streptococcus<br>Viridans group               | 1 (0.1)                         | 7 (1.1)             | 0 (0)              | 0 (0)                                        |
| Streptococci<br>Other Streptococci<br>species | 4 (0.3)                         | 4 (0.6)             | 0 (0)              | 0 (0)                                        |
| <i>Staphylococcus aureus</i>                  | 27 (1.8)                        | 10 (1.5)            | 0 (0)              | 0 (0)                                        |
| <i>Haemophilus influenzae</i>                 | 8 (0.5)                         | 5 (0.8)             | 0 (0)              | 0 (0)                                        |
| <i>Escherichia coli</i>                       | 10 (0.7)                        | 6 (0.9)             | 0 (0)              | 1 (1.5)                                      |
| <i>Pseudomonas aeruginosa</i>                 | 6 (0.4)                         | 1 (0.2)             | 0 (0)              | 1 (1.5)                                      |
| <i>Klebsiella pneumoniae</i>                  | 6 (0.4)                         | 4 (0.6)             | 0 (0)              | 2 (3.0)                                      |
| <i>Mycoplasma pneumoniae</i>                  | 37 (2.5)                        | 6 (0.9)             | 0 (0)              | 0 (0)                                        |
| <i>Chlamydia pneumoniae</i>                   | 7 (0.5)                         | 1 (0.2)             | 0 (0)              | 1 (1.5)                                      |
| <i>Legionella pneumophila</i>                 | 25 (1.7)                        | 7 (1.1)             | 0 (0)              | 0 (0)                                        |
| Other bacteria                                | 0 (0)                           | 4 (0.6)             | 1 (3.3)            | 0 (0)                                        |
| Any Virus                                     | 423 (28.1)                      | 144 (22.1)          | 3 (10)             | 20 (30.3)                                    |
| Influenza                                     | 94 (6.3)                        | 32 (4.9)            | 0 (0)              | 4 (6.1)                                      |
| Parainfluenza virus                           | 46 (3.1)                        | 18 (2.8)            | 2 (6.7)            | 1 (1.5)                                      |
| Coronavirus                                   | 36 (2.4)                        | 17 (2.6)            | 0 (0)              | 0 (0)                                        |
| Human<br>metapneumovirus                      | 63 (4.2)                        | 21 (3.2)            | 0 (0)              | 4 (6.1)                                      |
| Respiratory<br>syncytial virus                | 51 (3.4)                        | 17 (2.6)            | 0 (0)              | 0 (0)                                        |
| Human rhinovirus                              | 140 (9.3)                       | 41 (6.3)            | 1 (3.3)            | 11 (16.7)                                    |
| Adenovirus                                    | 23 (1.5)                        | 8 (1.2)             | 0 (0)              | 1 (1.5)                                      |

Abbreviations: n number; CT computed tomography; CXR chest x-ray

**e-Table 6.** Clinical outcomes, with the CXR pneumonia group sub-classified based on CT results: CXR pneumonia / CT not done (CXR+/CT not done); CXR pneumonia / CT pneumonia (CXR+/CT+); CXR pneumonia / CT no pneumonia (CXR+/CT-).

| Clinical Outcome                                             | CXR pneumonia             |                   |                  | CT-only pneumonia (CXR-/CT+) (n=66) |
|--------------------------------------------------------------|---------------------------|-------------------|------------------|-------------------------------------|
|                                                              | CXR+/CT not done (n=1503) | CXR+/CT + (n=652) | CXR+/CT - (n=30) |                                     |
| In-hospital death, n (%)                                     | 33 (2.2)                  | 15 (2.3)          | 1 (3.3)          | 0 (0)                               |
| Hospital length-of-stay (days) among survivors, median (IQR) | 3 (2-5)                   | 4 (2.5-7)         | 3 (2-6)          | 3.5 (2-5)                           |
| ICU admission, n (%)                                         | 316 (21)                  | 143 (21.9)        | 8 (26.7)         | 15 (22.7)                           |
| Invasive mechanical ventilation, n (%)                       | 72 (4.8)                  | 41 (6.3)          | 0 (0)            | 4 (6.1)                             |
| Vasopressor-dependent septic shock, n (%)                    | 52 (3.5)                  | 32 (4.9)          | 0 (0)            | 3 (4.6)                             |
| Moderate-severe ARDS, n (%)                                  | 66 (4.4)                  | 23 (3.5)          | 0 (0)            | 1 (1.5)                             |

Abbreviations: CT computed tomography; CXR chest x-ray; n number; IQR interquartile range; ICU intensive care unit; ARDS acute respiratory distress syndrome

**e-Table 7.** Timing of in-hospital antibiotics.

|                                               | CT-only pneumonia (n = 66) | CXR pneumonia (n = 2185) |
|-----------------------------------------------|----------------------------|--------------------------|
| Antibiotics ≤ 6 hours, n (%)                  | 39 (59%)                   | 1815 (83%)               |
| Antibiotics ≤ 12 hours, n (%)                 | 58 (88%)                   | 2046 (94%)               |
| Antibiotics ≤ 24 hours, n (%)                 | 64 (97%)                   | 2106 (96%)               |
| Median (IQR) time to first antibiotics, hours | 4.7 (2.6, 6.8)             | 2.9 (2.0, 4.5)           |



**e-Table 8.** Among patients with CT-only pneumonia [n=66], pathogens detected in patients with probable or definite pneumonia on CT and an elevated PCT ( $\geq 0.25$  ng/ml) [n=5] and patients not meeting these criteria. Fourteen patients could not be classified by these criteria due to missing procalcitonin (PCT) values; these patients are displayed separately in the table.

|                              | Probable/definite pneumonia on CT and PCT $\geq 0.25$ ng/ml (n = 5) | Probable/definite pneumonia on CT and missing PCT (n = 14)          | Possible pneumonia on CT and/or PCT $<0.25$ ng/ml (n = 47)              |
|------------------------------|---------------------------------------------------------------------|---------------------------------------------------------------------|-------------------------------------------------------------------------|
| Any pathogen detected, n (%) | 2 (40)                                                              | 6 (43)                                                              | 19 (40)                                                                 |
| Bacterial pathogen, n (%)    | 1 (20)                                                              | 3 (21)                                                              | 4 (9)                                                                   |
| Bacterial pathogens detected | <i>E. coli</i>                                                      | <i>S. pneumoniae</i><br><i>K pneumoniae</i><br><i>C. pneumoniae</i> | <i>S. pneumoniae</i> x 2<br><i>K pneumoniae</i><br><i>P. aeruginosa</i> |
| Viral Pathogen, n (%)        | 1 (20)                                                              | 3 (21)                                                              | 16 (34)                                                                 |
| Viral pathogens detected     | HPMV                                                                | HRV x 2<br>Flu A                                                    | HRV x 8<br>HMPV x 3<br>Flu A x 3<br>PIV<br>AdV                          |

Abbreviations: CT: computed tomography; PCT: procalcitonin; HPMV: human metapneumovirus; HRV: human rhinovirus; Flu A: influenza A virus; PIV: parainfluenza virus; AdV: adenovirus
